# Supplementary material for: Microscaled design of the linear and non-linear optical properties of tantalum germanate glasses by thermal poling
Source: Royal Society of Chemistry journal article supplement (doi:10.1039/d2tc01634f), 2022-01-01
Supplement: d2tc01634f1.pdf [file d2tc01634f1.pdf]

## Supporting information

**Supplementary Material S1:** Intensity distribution profiles of the incident azimuthally (left) or radially (right) polarized beam in the focal region. The profiles were calculated for a 1064 nm incident beam corresponding to the two different objectives employed in this work with numerical apertures of respectively 0.9 in air (top) and of 1.3 in oil (bottom) (bottom)

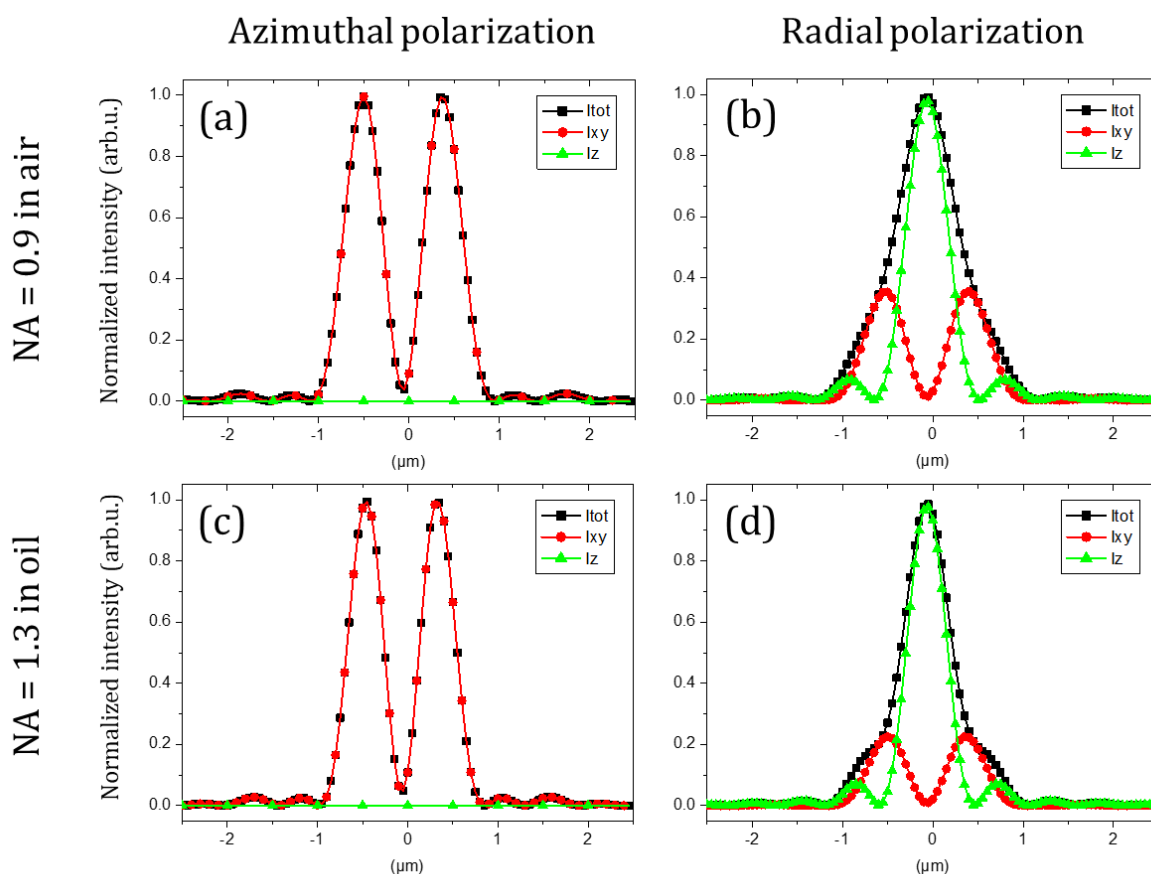

**Supplementary Material S2:** Schematic of  $\Delta n$  estimation taking into account topology corrections.

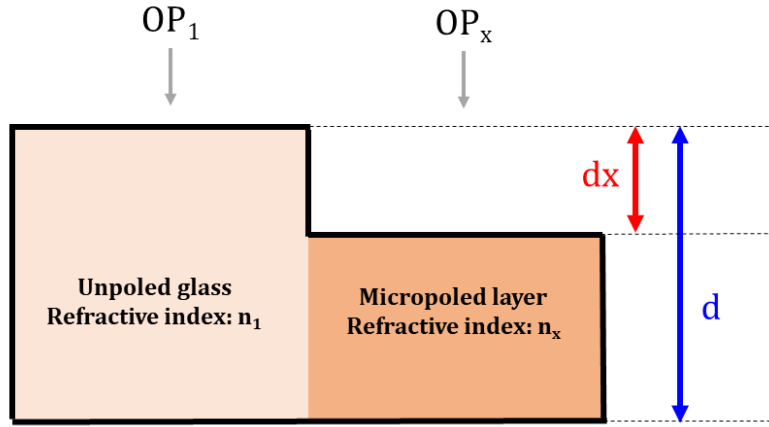

$d_x$  : topological depth (measured by AFM)

$d \gg d_x$  and can be considered to be  $2.5 \mu\text{m}$  (poled layer measured by SHG microscopy) [38]

$n_1 = 1.83$  (measured by the Brewster angle) [38]

$$OP_1 = n_1 \cdot d$$

$$OP_x = n_x \cdot (d - d_x) + n_{\text{air}} \cdot d_x = n_1 \cdot (d - d_x) + d_x$$

$$OPD = OP_x - OP_1$$

Then:

$$n_x = \frac{OPD - dx + n_1 \cdot d}{d - dx}$$

And:

$$\Delta n = n_x - n_1$$

| Sample           | G-70/4            | G-4/4             |
|------------------|-------------------|-------------------|
| $n_1$            | 1.83              | 1.83              |
| $d$              | $2.5 \mu\text{m}$ | $2.5 \mu\text{m}$ |
| $d_x$ (Figure 5) | 100 nm            | 75 nm             |
| OPD (Figure 6)   | 60 nm             | 45 nm             |
| $n_x$            | 1.839             | 1.837             |
| $\Delta n$       | 0.009             | 0.007             |
